# Supplementary material
Source: PubMed Central journal article supplement (PMC3477207)
Supplement: supp_112.195446_JPET195446_Supplemtal_Figure_.pdf [file supp_112.195446_JPET195446_Supplemtal_Figure_.pdf]

**Vinpocetine suppresses pathological vascular remodeling through inhibiting vascular smooth muscle cell proliferation and migration**

Yujun Cai, Walter E. Knight, Shujie Guo, Jian-Dong Li, Peter A. Knight and Chen Yan

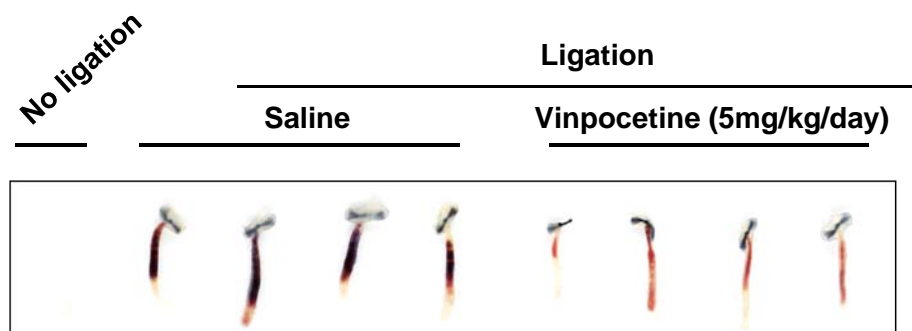

**Supplemental Figure S1.** Vinpocetine administered systemically reduces neointimal formation and thrombosis. Images of left carotid arteries from mice underwent complete ligation for 14 days, systemically treated with saline or vinpocetine (5mg/kg/day) via i.p.
